# Supplementary material for: Disruption of androgen receptor-cofactor interactions by the RNA-binding protein FUS/TLS alters androgen signalling in prostate cancer
Source: Research Square preprint supplement (doi:10.21203/rs.3.rs-6609773/v1), 2025-05-22
Supplement: Supplementary file 1 [file fa59c2628b807ea4a6019c77.pdf]

Brooke *et al.* Supplemental Figure 1

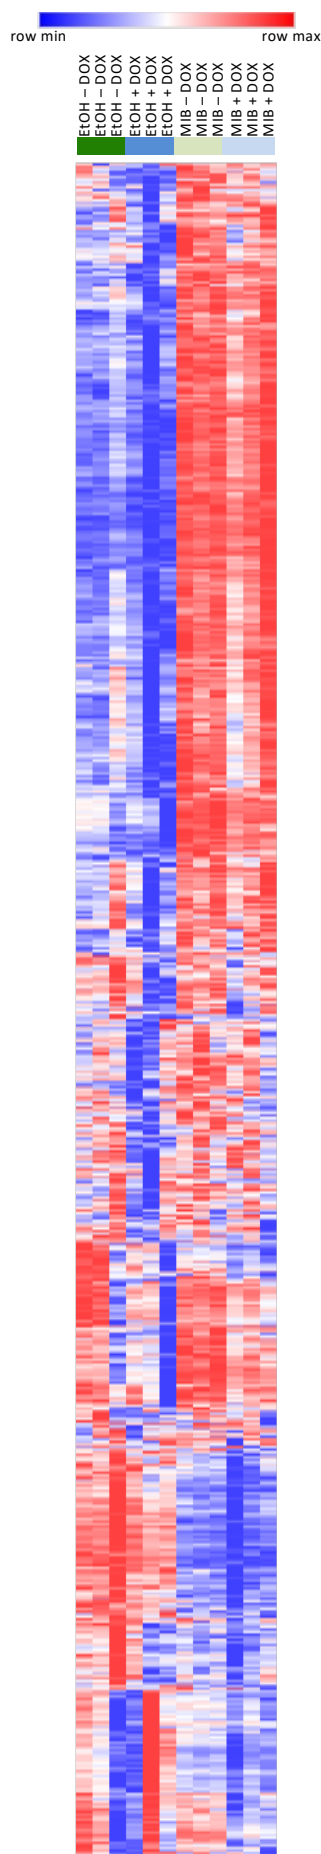

**Supplemental Figure 1. The effect of doxycycline upon gene expression in the parental LNCaP-TR2 line.** The parental LNCaP-TR2 cell line was treated ± mibolerone (MIB) ± doxycycline (DOX) for 24hrs and enhanced FUS expression confirmed using immunoblotting. Microarray analysis was performed to identify genes differentially expressed in response to MIB and/or DOX. Heat map visualization of the genes found to be differentially regulated in response to MIB and/or DOX. Each vertical line represents one sample.
